# Supplementary material
Source: PubMed Central journal article supplement (PMC6002776)
Supplement: NIHMS958713-supplement-SM1.pdf [file NIHMS958713-supplement-SM1.pdf]

## Supplementary Materials for

### Identification of a Titin-Derived HLA-A1–Presented Peptide as a Cross- Reactive Target for Engineered MAGE A3–Directed T Cells

Brian J. Cameron, Andrew B. Gerry, Joseph Dukes, Jane V. Harper, Vivekanandan Kannan, Frayne C. Bianchi, Francis Grand, Joanna E. Brewer, Minnal Gupta, Gabriela Plesa, Giovanna Bossi, Annelise Vuidepot, Alex S. Powlesland, Alison Legg, Katherine J. Adams, Alan D. Bennett, Nicholas J. Pumphrey, Daniel D. Williams, Gwendolyn Binder-Scholl, Irina Kulikovskaya, Bruce L. Levine, James L. Riley, Angel Varela-Rohena, Edward A. Stadtmauer, Aaron P. Rapoport, Gerald P. Linette, Carl H. June, Namir J. Hassan, Michael Kalos, Bent K. Jakobsen\*

\*Corresponding author. E-mail: bent.jakobsen@immunocore.com

Published 7 August 2013, *Sci. Transl. Med.* **5**, 197ra103 (2013)  
DOI: 10.1126/scitranslmed.3006034

#### **This PDF file includes:**

##### Materials and Methods

Fig. S1. Efficacy of a3a-engineered T cells in a mouse model of ovarian cancer.

Fig. S2. Activation of a3a-engineered T cells by differentiated human skeletal muscle myoblasts (HSMM) and B cell lymphoma NALM/6 cells.

Fig. S3. Mass spectrometry fragmentation of Titin peptide.

Fig. S4. T cells engineered with wild-type TCR respond to iCells pulsed with Titin peptide.

Table S1. qRT-PCR analysis of MAGE A3/A6/B18 expression in the tumor cell lines used in this study.

Table S2. Alternative MAGE antigens tested for cross-reactivity with a3a-engineered T cells.

Table S3. qRT-PCR analysis of MAGE A3/A6/B18 expression patient heart tissue obtained at autopsy and from tissue obtained from normal hearts.

Table S4. Normal cardiac cells tested for activation of a3a-engineered T cells.

Table S5. qRT-PCR analysis of MAGE A3 expression in iCells and NALM/6 cells.

Table S6. Peptides identified in a BLAST search and tested for cross-reactivity with a3a-engineered T cells.

Legend for video S1

#### **Other Supplementary Material for this manuscript includes the following:**

(available at  
[www.sciencetranslationalmedicine.org/cgi/content/full/5/197/197ra103/DC1](http://www.sciencetranslationalmedicine.org/cgi/content/full/5/197/197ra103/DC1))

Video S1 (.avi format). Actively beating iCells.

## **Supplementary Material**

### **Materials and Methods**

#### *OV79 tumor model*

NOD-SCID-IL-2Rgc null (NSG, JAX stock # 005557 ) mice were produced and provided by the Stem Cell and Xenograft Core at the University of Pennsylvania School of Medicine, using breeders obtained from Jackson Laboratory (Bar Harbor). Mice were housed in sterile conditions using HEPA-filtered microisolators and fed with irradiated food and acidified water. Transplanted mice were treated with antibiotics (neomycin and polymyxin) for the duration of the experiment. Animals were used in accordance with a protocol reviewed and approved by the Institutional Animal Care and Use Committee. Six to eight week-old animals were utilized. For these experiments OV79 was engineered by lentivirus transduction to express luciferase in essentially 100% of cells (OV79-Luc). On day 0 individual mice were implanted with  $1 \times 10^6$  OV79-luc by subcutaneous administration into the right flank in 100  $\mu$ l 50% matrigel (BD Biosciences).

Following tumor implantation animals were apportioned into one of 4 cohorts, with 14 animals/cohort. Seven days post-tumor implantation, each animal in cohorts 1-3 was injected with  $1 \times 10^7$  CD3+ T cells prepared as described above in a final volume of 50  $\mu$ l PBS. Cohorts 1 and 2 received T cells transduced to express the affinity enhanced  $\alpha 3a$  (34.8% transduced) and wild-type (28% transduced) receptor respectively, while animals in cohort 3 received non-modified but ex-vivo expanded T cells. Cohort 4 animals received no T cells. Animals were monitored weekly for tumor growth by caliper measurement and twice monthly by bioluminescence imaging. Tumor measurements (length x width) were conducted weekly using caliper measurements. Tumor volume was determined according to the formula: tumor volume (mm<sup>3</sup>) = (length x width<sup>2</sup>)/2.

Anesthetized animals were imaged using a Xenogen Spectrum system and Living Image v3.2 software. For imaging, animals, weighed on the day of imaging, were given an intraperitoneal injection of 10 mg/kg body weight D-luciferin (Caliper Life Sciences) re-suspended in sterile PBS at a concentration of 15 mg/mL (100  $\mu$ L luciferin solution/10 g mouse body weight). Animals were imaged in groups of 5 at exactly 15 minutes post-luciferin injection and serial images collected at various exposure settings until the maximal exposure (60,000 counts) was reached. Data were analyzed with the Living Image v3.2 software using images taken with identical settings for mice of all groups at each time point. Imaging data were converted to photons/second/cm<sup>2</sup>/steradian to

normalize each image for exposure time, f-stop, binning and animal size. Statistical analyses were performed using the software Prism. Survival curves were compared using a Log-rank test.

#### *Video Microscopy*

The time-lapse video of beating iCells was obtained using DIC optics and a 20x magnification objective mounted on a Zeiss 200M inverted microscope. The images were taken using MetaMorph 7.7.4.0 (Molecular Devices) stream acquisition every 2 ms and the video time frame was 5 s.

*Q-RT-PCR, Mass Spectrometry and IFN $\gamma$  ELISpot assays were performed as described in the main text.*

## Figures and Tables

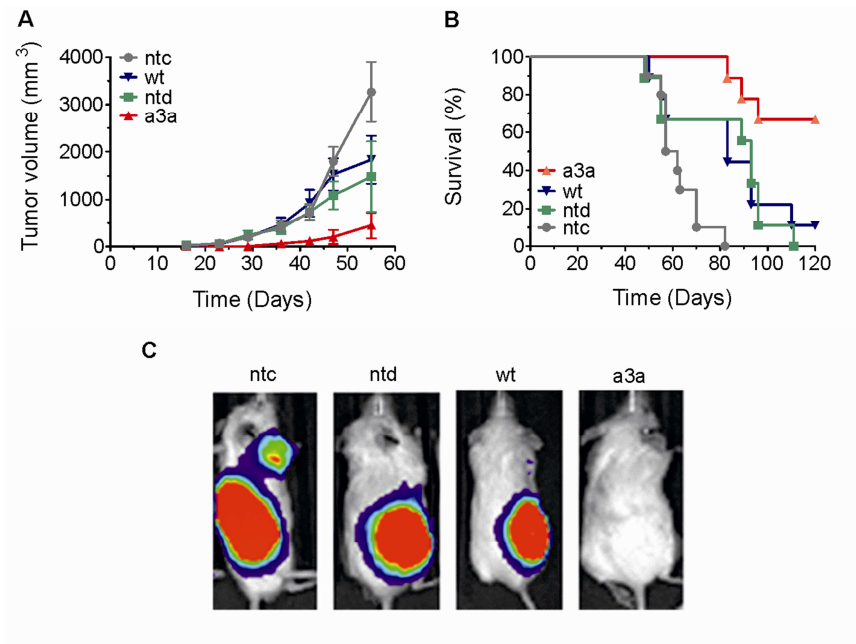

**Fig. S1.** Efficacy of a3a-engineered T cells in a mouse model of ovarian cancer. In each case ntc indicates no T cells, ntd indicates non-transduced cells and wt indicates T cells transduced with the non-modified TCR. **(A)** Average tumor volume measurements for each cohort, +/- SD **(B)** Kaplan-Meier survival plots. Mice treated with T cells engineered to express the a3a receptor demonstrated a statistically significant survival rate compared to the non-transduced cells ( $p = 0.005$  (Log-rank test,  $n = 18$ )). Injection of non-modified T cells resulted in a delay in tumor growth and a non-statistically significant ( $p=0.02$  (Log-rank test,  $n = 19$ )) increase in median survival to 93 days compared to no T cell injection, presumably reflecting the consequence of alloreactivity of the infused T cells against the OV79 cells. While the impact of injecting T cells expressing the wild type MAGE A3 receptor was indistinguishable from that of the non-modified T cells, a3a-engineered T cells resulted in a reduction in tumor growth and survival benefit, with greater than 50% of the animals alive for this cohort at the end of the 120 day period. **(C)** Representative bioluminescence imaging data from the day 62 time-point.

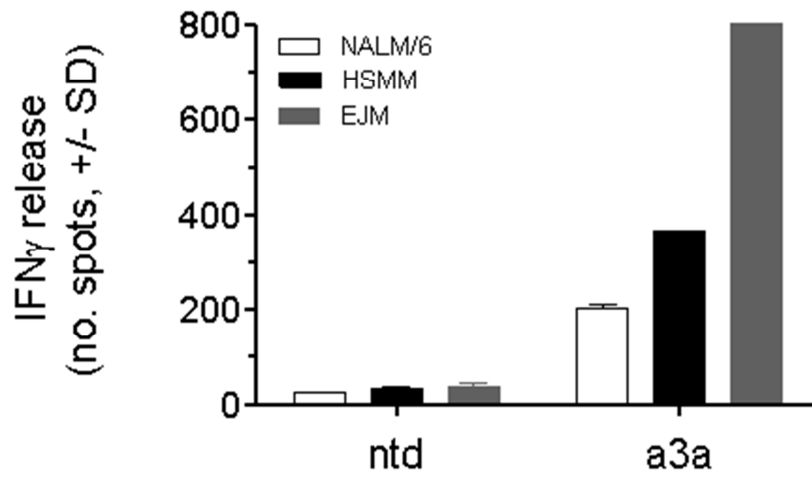

**Fig. S2.** Activation of a3a-engineered T cells by differentiated human skeletal muscle myoblasts (HSMM) and B cell lymphoma NALM/6 cells. Activation was determined by IFN $\gamma$  ELISpot. Data represent the average of three independent measurements +/- SD. EJM cells were used as a positive control for T cell activation.

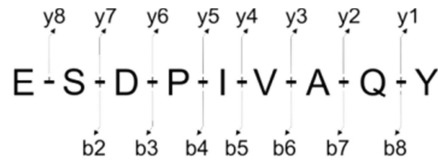

MS/MS spectrum of synthetic peptide ESDPIVAQY (10 fMoles on column) with major ions annotated

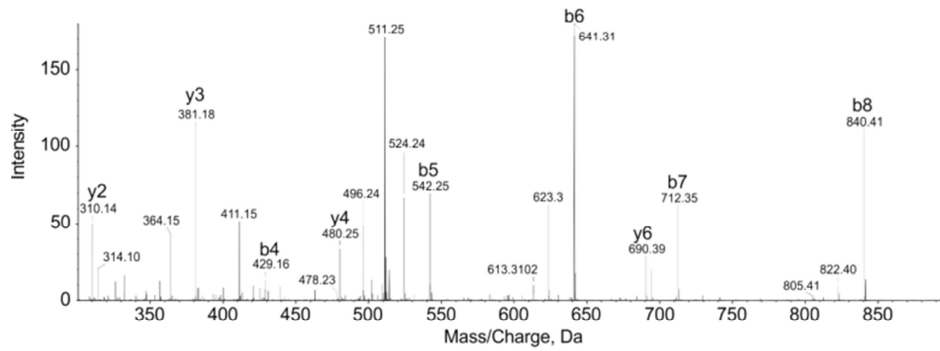

MS/MS spectrum of peptides eluted from the surface of NALM6 cells

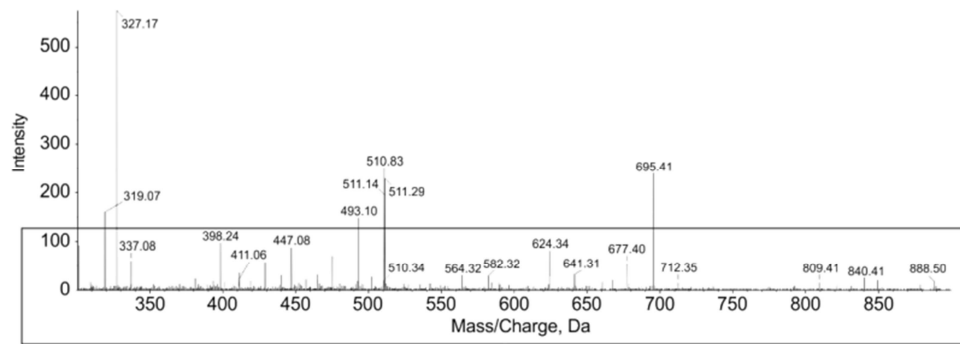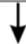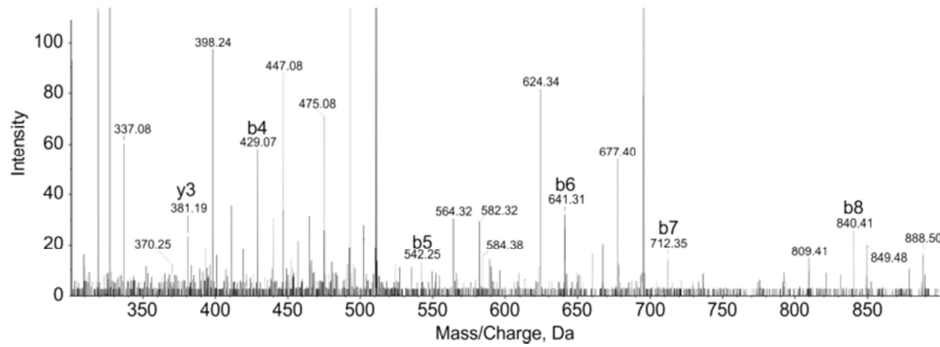

**Fig. S3.** Mass spectrometry fragmentation of Titin peptide. The sequence of the Titin peptide is shown at the top, with the predicted fragments indicated and the spectrum of the synthetic Titin peptide shown immediately below. Analysis of the peptides from NALM/6 cells is shown in the bottom two panels, with the lower panel showing the boxed area in greater detail. The relevant fragments of the Titin peptide are indicated.

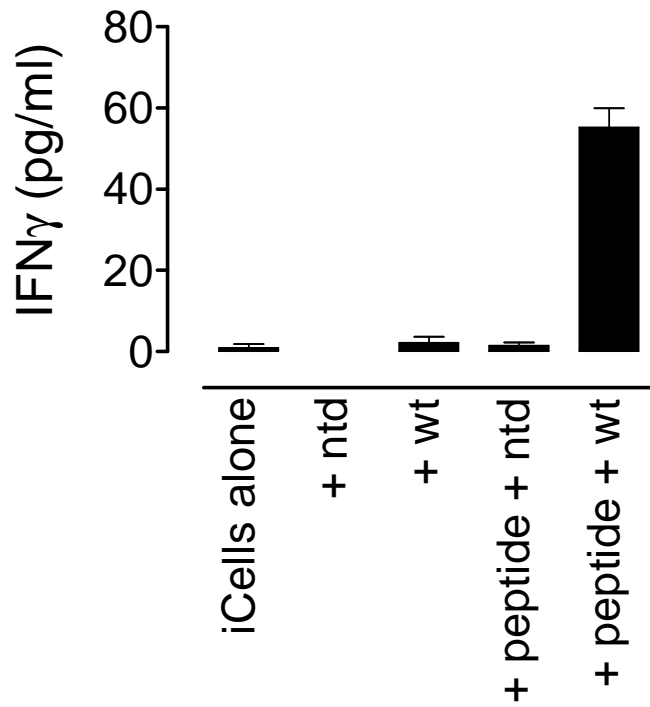

**Fig. S4.** T cells engineered with wild-type TCR respond to iCells pulsed with Titin peptide. iCells were transduced with HLA-A1 and incubated in the presence or absence of T cells and/or 10  $\mu$ M Titin peptide as indicated. The IFN $\gamma$  response was measured on the Luminex platform. Non-transduced T cells (ntd) were used as a negative control. Data represent the average of three independent measurements  $\pm$  SD.



| Cell line | Cell type            | HLA-A*01 | Reference * | MAGE A3 |       | MAGE A6 |       | MAGE B18 |       |
|-----------|----------------------|----------|-------------|---------|-------|---------|-------|----------|-------|
|           |                      |          | Ct          | Ct      | RQ    | Ct      | RQ    | Ct       | RQ    |
| A375      | melanoma             | positive | 18.9        | 24.3    | 1.000 | 26.4    | 1.000 | 33.1     | 1.000 |
| HCT-116   | colorectal carcinoma | positive | 21.4        | 29.7    | 0.344 | 28.7    | 1.085 | -        | -     |
| OV79      | ovarian carcinoma    | positive | 15.1        | 28.3    | 0.004 | 30.8    | 0.004 | 37.8     | 0.003 |
| Mel526    | melanoma             | negative | 16.9        | 26.2    | 0.224 | 25.7    | 0.475 | 32.1     | 0.525 |
| HEP2      | normal hepatocytes   | positive | 15.5        | -       | -     | -       | -     | -        | -     |
| M108      | mesothelioma         | positive | 16.6        | -       | -     | -       | -     | 37.8     | 0.009 |
| EJM       | multiple myeloma     | positive | 23.7**      | 25.4    | 0.54  | 28.47   | 0.312 | 37.0     | 0.101 |
| colo205   | colorectal carcinoma | positive | 20.8        | -       | -     | -       | -     | -        | -     |

\* $\beta$ -Actin

\*\*Gus-B

- no signal detected

**Table S1.** qRT-PCR analysis of MAGE A3/A6/B18 expression in the tumor cell lines used in this study

| Antigen   | Sequence |   |   |   |   |   |   |   |    | a3a TCR cellular activity |
|-----------|----------|---|---|---|---|---|---|---|----|---------------------------|
| MAGE-A3   | E        | V | D | P | I | G | H | L | Y  | Yes                       |
| MAGE-A6   | E        | V | D | P | I | G | H | V | Y  | Yes                       |
| MAGE-B18  | E        | V | D | P | I | R | H | Y | Y  | Yes, low                  |
| MAGE-A1   | E        | A | D | P | T | G | H | S | Y  | x                         |
| MAGE-A2   | E        | V | V | P | I | S | H | L | Y  | x                         |
| MAGE-A4   | E        | V | D | P | T | S | N | T | Y  | x                         |
| MAGE-A8/9 | E        | V | D | P | A | G | H | S | Y  | x                         |
| MAGE-A10  | E        | V | D | P | T | G | H | S | F  | x                         |
| MAGE-A11  | E        | V | D | P | T | S | H | S | Y  | x                         |
| MAGE-A12  | E        | V | V | R | I | G | H | L | Y  | x                         |
| MAGE-B1   | E        | D | N | P | S | G | H | T | Y  | x                         |
| MAGE-B2   | K        | V | N | P | N | G | H | T | Y  | x                         |
| MAGE-B3   | K        | V | D | S | T | K | D | S | Y  | x                         |
| MAGE-B4   | E        | V | N | P | T | T | H | S | Y  | x                         |
| MAGE-B5   | E        | V | N | P | T | C | H | L | Y  | x                         |
| MAGE-B6   | E        | M | D | S | S | G | E | S | Y  | x                         |
| MAGE-B10  | E        | V | E | P | N | K | H | I | Y  | x                         |
| MAGE-B16  | E        | V | D | P | T | T | H | C | Y  | x                         |
| MAGE-B17  | E        | M | D | P | S | R | Q | S | Y  | x                         |
| MAGE-C1a  | E        | V | D | P | D | D | S | Y | VF | x                         |
| MAGE-C1b  | E        | V | D | P | D | D | S | Y | V  | x                         |
| MAGE-C2a  | E        | V | G | P | D | H | F | C | VF | x                         |
| MAGE-C2b  | E        | V | G | P | D | H | F | C | V  | x                         |
| MAGE-C3a  | E        | V | D | P | D | H | F | Y | VF | x                         |
| MAGE-C3b  | E        | V | D | P | D | H | F | Y | V  | x                         |
| MAGE-D1/4 | E        | I | D | K | E | E | H | L | Y  | x                         |
| MAGE-D2   | E        | I | D | K | N | D | H | L | Y  | x                         |
| MAGE-E1   | E        | L | D | P | E | A | H | T | Y  | x                         |
| MAGE-E2   | E        | V | D | T | S | E | H | I | Y  | x                         |
| MAGE-F1   | Q        | F | D | R | K | H | H | T | Y  | x                         |
| MAGE-G1   | E        | L | E | P | K | S | N | T | Y  | x                         |
| MAGE-G1b  | E        | L | E | P | K | S | H | S | Y  | x                         |
| MAGE-L2   | E        | I | D | T | K | N | H | A | Y  | x                         |

**Table S2.** Alternative MAGE antigens tested for cross-reactivity with a3a-engineered T cells. T cell activity was assessed by IFN- $\gamma$  ELISpot

| Sample              | Reference* | MAGE A3 |       | MAGE A6 |       | MAGE B18 |       |
|---------------------|------------|---------|-------|---------|-------|----------|-------|
|                     | Ct         | Ct      | RQ    | Ct      | RQ    | Ct       | RQ    |
| A375                | 25.21      | 29.20   | 1.000 | 31.39   | 1.000 | 36.89    | 1.000 |
| Patient 1, sample 1 | 25.60      | -       | -     | -       | -     | -        | -     |
| Patient 2, sample 1 | 28.11      | -       | -     | -       | -     | -        | -     |
| Patient 2, sample 2 | 27.13      | -       | -     | -       | -     | -        | -     |
| Patient 2, sample 3 | 27.56      | -       | -     | -       | -     | -        | -     |
| Normal heart 1      | 26.63      | -       | -     | -       | -     | -        | -     |
| Normal heart 2      | 29.23      | -       | -     | -       | -     | -        | -     |
| Normal heart 3      | 27.74      | -       | -     | -       | -     | -        | -     |
| Normal heart 4      | 26.05      | -       | -     | -       | -     | -        | -     |
| Normal heart 5      | 26.65      | -       | -     | -       | -     | -        | -     |

\*PPIB (Peptidylpropyl isomerase B)

- no signal detected

**Table S3.** qRT-PCR analysis of MAGE A3/A6/B18 expression patient heart tissue obtained at autopsy and from tissue obtained from normal hearts.

| <b>Cardiac tissue</b>                   |
|-----------------------------------------|
| Aortic Adventitial Fibroblasts          |
| Cardiac Fibroblasts                     |
| Aortic Endothelial Cells                |
| Cardiac Microvascular Endothelial Cells |
| Cardiac Myocytes                        |
| Coronary Artery Smooth Muscle Cells     |
| Coronary Artery Endothelial Cells       |

**Table S4.** Normal cardiac cells tested for activation of a3a-engineered T cells

| Cell line            | Cell type                         | Relative expression level<br>MAGE A3/A6* |
|----------------------|-----------------------------------|------------------------------------------|
| A375 (MAGE A3 +)     | Melanoma cell line                | 1.00                                     |
| iCell cardiomyocytes | Electrically active cardiac cells | 0.00                                     |
| NALM/6               | B cell lymphoma cell line         | 0.00                                     |
| HSMM                 | Human Skeletal Muscle Myoblasts   | 0.00                                     |

\* $\beta$ -Actin was used as the reference transcript for this experiment

**Table S5.** qRT-PCR analysis of MAGE A3 expression in iCells, NALM/6 and human skeletal muscle myoblast cells

| Antigen    | Sequence |   |   |   |   |   |   |   |   | a3a TCR cellular activity |
|------------|----------|---|---|---|---|---|---|---|---|---------------------------|
| MAGE-A3    | E        | V | D | P | I | G | H | L | Y | Yes                       |
| MAGE-A6    | E        | V | D | P | I | G | H | V | Y | Yes                       |
| MAGE-B18   | E        | V | D | P | I | R | H | Y | Y | Yes (low)                 |
| Caveolin-1 | Y        | V | D | S | E | G | H | L | Y | x                         |
| FGD5       | E        | V | G | P | I | F | H | L | Y | x                         |
| ERRFI1     | N        | I | D | P | I | T | M | A | Y | x                         |
| RFWD2      | V        | V | D | N | I | D | H | L | Y | x                         |
| DMXL2      | R        | V | D | P | I | G | P | L | S | x                         |
| ATF4       | T        | V | N | P | I | G | H | L | P | x                         |
| PZP        | P        | K | A | P | V | G | H | L | Y | x                         |
| LMX1A      | V        | G | N | P | I | D | H | L | Y | x                         |
| AOX1       | P        | E | D | P | I | G | H | P | I | x                         |
| ARAP3      | L        | A | T | L | I | G | H | L | Y | x                         |
| MARS2      | A        | A | P | H | I | G | H | L | Y | x                         |
| SYNGAP1    | E        | V | D | P | I | K | C | T | A | x                         |
| TNRC6B     | S        | P | D | P | I | G | H | N | P | x                         |
| COEA1      | E        | V | D | P | I | T | T | F | P | x                         |
| BRD4       | V        | F | D | P | I | G | H | F | T | x                         |

**Table S6.** Peptides identified in a BLAST search and tested for cross-reactivity with a3a-engineered T cells. Activity was determined by IFN $\gamma$  ELISpot

**Video 1** Actively beating iCells

See separate file
